# Supplementary material for: Lamellar-structured biomass-derived phosphorus- and nitrogen-co-doped porous carbon for high-performance supercapacitors
Source: Royal Society of Chemistry journal article supplement (doi:10.1039/c5nj02080h), 2015-01-01
Supplement: c5nj02080h1.pdf [file c5nj02080h1.pdf]

**Electronic Supplementary Information (ESI) Material  
for New Journal of Chemistry**

**Phosphorus and nitrogen co-doped porous carbon derived from fish  
scale for high performance supercapacitors**

*Jie Wang,<sup>a</sup> Laifa Shen,<sup>a</sup> Yunling Xu,<sup>a</sup> Hui Dou<sup>a</sup> and Xiaogang Zhang<sup>\*a</sup>*

Jiangsu Key Laboratory of Materials and Technology for Energy Conversion, College  
of Material Science and Engineering, Nanjing University of Aeronautics and  
Astronautics, Nanjing, 210016, P. R. China

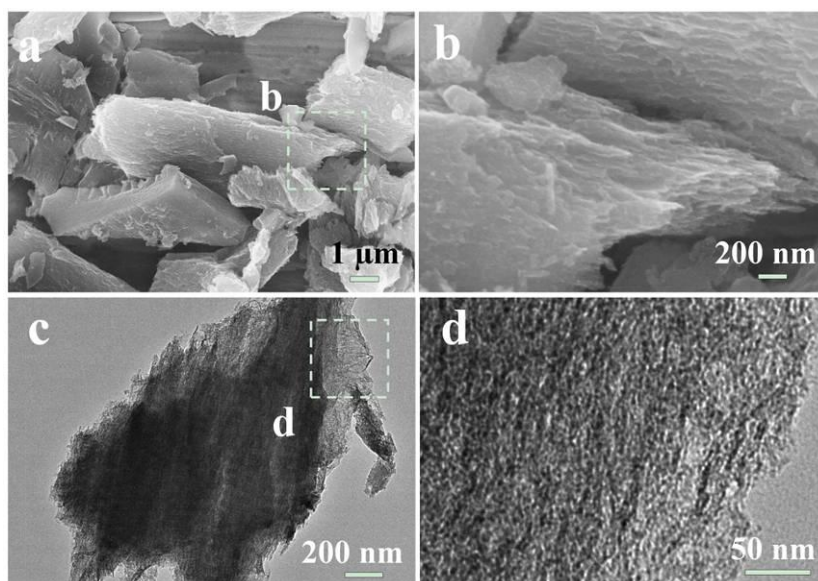

**Fig. S1** SEM images (a, b) and TEM images (c, d) of SC.

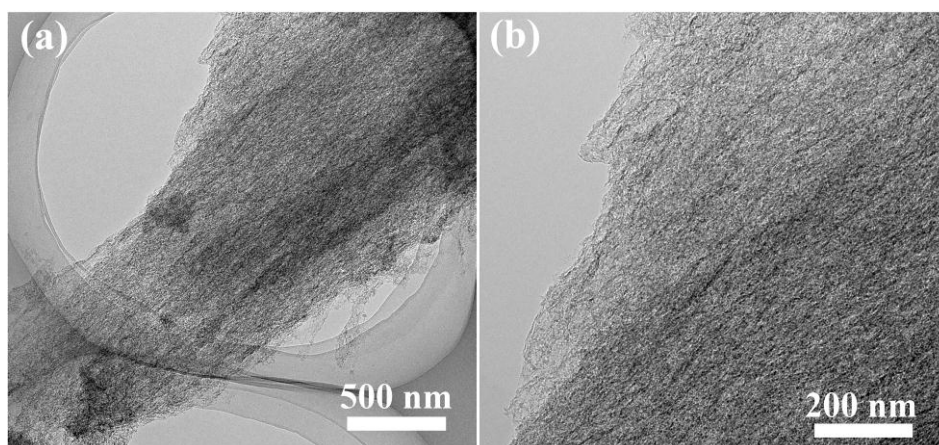

**Fig. S2** TEM images of SAC-1.

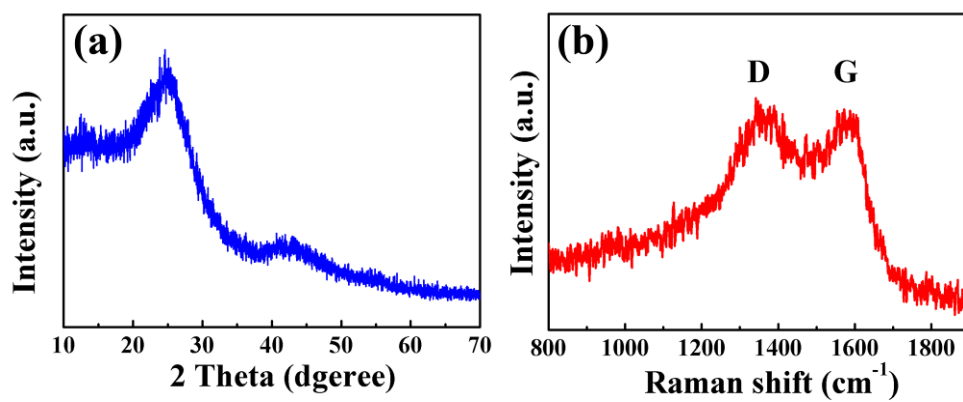

Fig. S3 (a) XRD pattern and (b) Raman spectra of SAC-1.

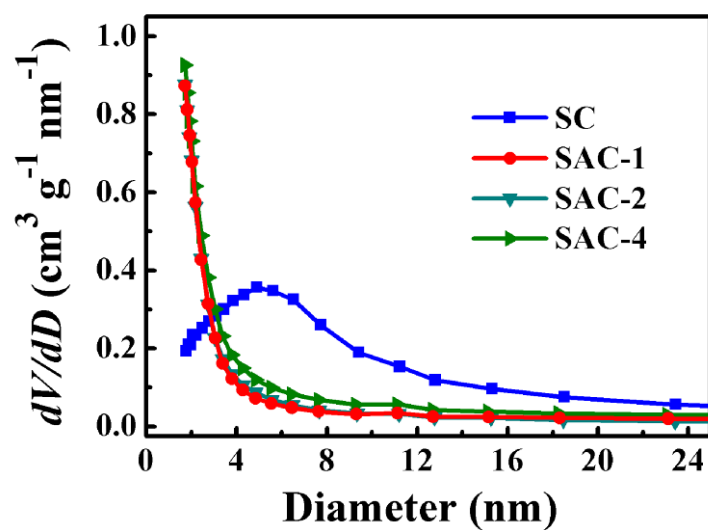

Fig. S4 PSD of SC and different SAC samples.

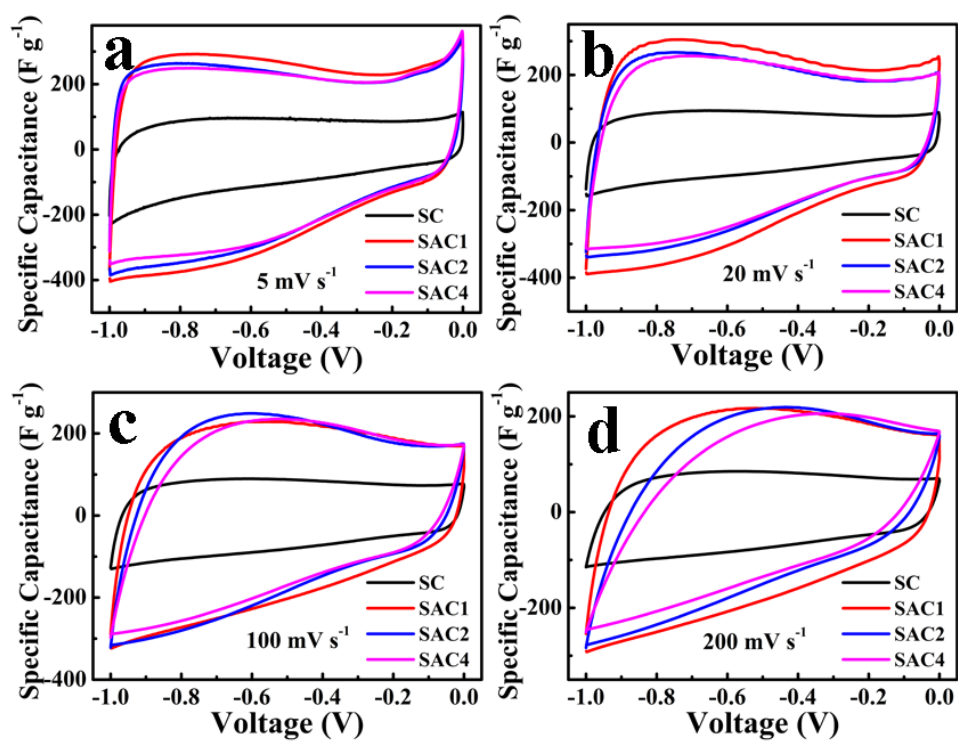

**Fig. S5** Cyclic voltammograms of SC, SAC-1, SAC-2 and SAC-4 at a scan rate of (a)

$5 mV s^{-1}$ , (b)  $20 mV s^{-1}$ , (c)  $100 mV s^{-1}$ , and (d)  $200 mV s^{-1}$ .

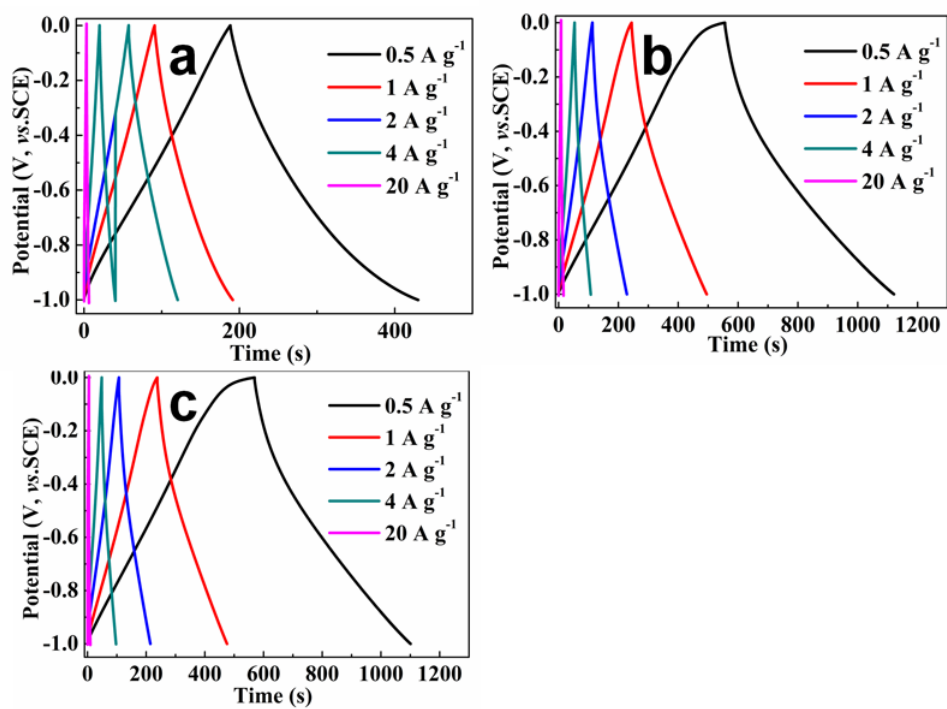

**Fig. S6** Galvanostatic charge–discharge curves at different current densities in 6 M KOH of (a) SC, (b) SAC-2 and (c) SAC-4.

Table S1. Weight percentage of element and approximate distribution of N functional groups in different samples.

|       | N% <sup>a</sup> | C% <sup>a</sup> | N% <sup>b</sup> | P% <sup>b</sup> | O% <sup>b</sup> | N-Q <sup>c</sup> | N-5 <sup>c</sup> | N-6 <sup>c</sup> | N-X <sup>c</sup> |
|-------|-----------------|-----------------|-----------------|-----------------|-----------------|------------------|------------------|------------------|------------------|
| SC    | 7.24            | 82.75           | 6.88            | 1.12            | 5.95            | 37               | 39               | 12               | 12               |
| SAC-1 | 5.97            | 78.32           | 5.74            | 0.98            | 12.76           | 23               | 47               | 23               | 7                |
| SAC-2 | 4.83            | 77.84           | 4.84            | 0.78            | 13.90           | 24               | 41               | 27               | 8                |
| SAC-4 | 3.42            | 75.34           | 3.36            | 0.41            | 17.69           | 23               | 46               | 24               | 7                |

a: The contents of N and C obtained from the elemental analysis results;

b: The contents of N, P, O and C obtained from the XPS results;

c: Approximate distribution of N functional groups obtained by fitting the N 1s core level XPS spectra.

Compared with the results of elemental analysis, some discrepancies on each activation ratios, but generally the same tendency is shown with increasing the activation ratios. These discrepancies on the results are attributed to the atomic ratios near the surface of carbons due to the thin penetration depth of X-rays.
